# Supplementary material
Source: PubMed Central journal article supplement (PMC3549873)
Supplement: epi-8-105-s01.pdf [file epi-8-105-s01.pdf]

## **Supplemental Material to:**

**Raffaella Barbano, Lucia Anna Muscarella, Barbara Pasculli,  
Vanna Maria Valori, Andrea Fontana, Michelina Coco,  
Annamaria la Torre, Teresa Balsamo, Maria Luana Poeta,  
Giovanni Francesco Marangi, Evaristo Maiello, Marina  
Castelvetere, Fabio Pellegrini, Roberto Murgio, Vito  
Michele Fazio and Paola Parrella**

**Aberrant keap1 methylation in breast cancer and  
association with clinicopathological features**

**Epigenetics 2012; 8(1)**

**<http://dx.doi.org/10.4161/epi.23319>**

**<http://www.landesbioscience.com/journals/epigenetics/article/23319>**

**Supplemental Table 1.** Descriptive statistics of study population (n=102).

| <b>Characteristics</b>                                | <b>n</b> | <b>%</b> |
|-------------------------------------------------------|----------|----------|
| <b>Family History</b> (no <i>BRCA1/BRCA2</i> related) |          |          |
| No                                                    | 90       | 88.2     |
| Yes                                                   | 12       | 11.8     |
| <b>Menopause</b>                                      |          |          |
| No                                                    | 31       | 30.4     |
| Yes                                                   | 71       | 69.6     |
| <b>Tumor histotype</b>                                |          |          |
| Ductal                                                | 90       | 88.3     |
| Lobular                                               | 8        | 7.8      |
| Others                                                | 4        | 3.9      |
| <b>Tumor</b>                                          |          |          |
| T1c                                                   | 38       | 37.2     |
| T2                                                    | 42       | 41.2     |
| T3                                                    | 3        | 2.9      |
| T4                                                    | 15       | 14.8     |
| Missing                                               | 4        | 3.9      |
| <b>Lymph nodes</b>                                    |          |          |
| N0                                                    | 41       | 40.2     |
| N1                                                    | 31       | 30.4     |
| N2                                                    | 16       | 15.7     |
| N3                                                    | 14       | 13.7     |
| <b>Metastases</b>                                     |          |          |
| 0                                                     | 96       | 94.1     |
| 1                                                     | 6        | 5.9      |
| <b>Stage</b>                                          |          |          |
| I                                                     | 23       | 22.6     |
| II                                                    | 41       | 40.2     |
| III                                                   | 28       | 27.4     |
| IV                                                    | 6        | 5.9      |
| Missing                                               | 4        | 3.9      |
| <b>Er status</b>                                      |          |          |
| Positive                                              | 68       | 66.7     |
| Negative                                              | 34       | 33.3     |
| <b>PgR status</b>                                     |          |          |
| Positive                                              | 62       | 60.8     |
| Negative                                              | 40       | 39.2     |
| <b><i>HER2</i> amplification/overexpression</b>       |          |          |
| Negative                                              | 62       | 60.8     |
| Positive                                              | 25       | 24.5     |
| Missing                                               | 15       | 14.7     |
| <b>Receptor Classification</b>                        |          |          |
| Er positive Her2 negative                             | 42       | 41.2     |
| Er positive Her2 positive                             | 11       | 10.8     |
| Triple Negative                                       | 20       | 19.6     |
| <i>HER2</i> amplified only                            | 14       | 13.7     |
| Not classified                                        | 15       | 14.7     |
| <b>Grade</b>                                          |          |          |
| G1                                                    | 10       | 9.8      |
| G2                                                    | 37       | 36.3     |
| G3                                                    | 39       | 38.2     |
| missing                                               | 16       | 15.7     |
| <b>Ki67/Mib1 labelling index</b>                      |          |          |
| ≤30%                                                  | 46       | 45.0     |
| >30                                                   | 40       | 39.2     |
| Missing                                               | 16       | 15.8     |
| <b>Adjuvant Treatment</b> (n=96)                      |          |          |
| Hormone therapy alone                                 | 17       | 17.7     |
| Hormone therapy + Chemotherapy                        | 45       | 46.9     |
| Chemotherapy                                          | 34       | 35.4     |
| <b>Adjuvant Chemotherapy regimen*</b> (n=79)          |          |          |
| FEC                                                   | 32       | 40.5     |
| EC/D                                                  | 30       | 38.0     |
| CMF                                                   | 11       | 13.9     |
| EPI/VNR                                               | 6        | 7.6      |

Data are reported as median along with interquartile range (IQR) for continuous variables and as frequencies and percentages for categorical variables.

\*FEC, 6 cycles of combination therapy with Fluorouracil (5FU), epirubicin and cyclophosphamide; EC/D, 4 cycles of combination therapy with epirubicin and cyclophosphamide followed by 4 cycles of docetaxel.

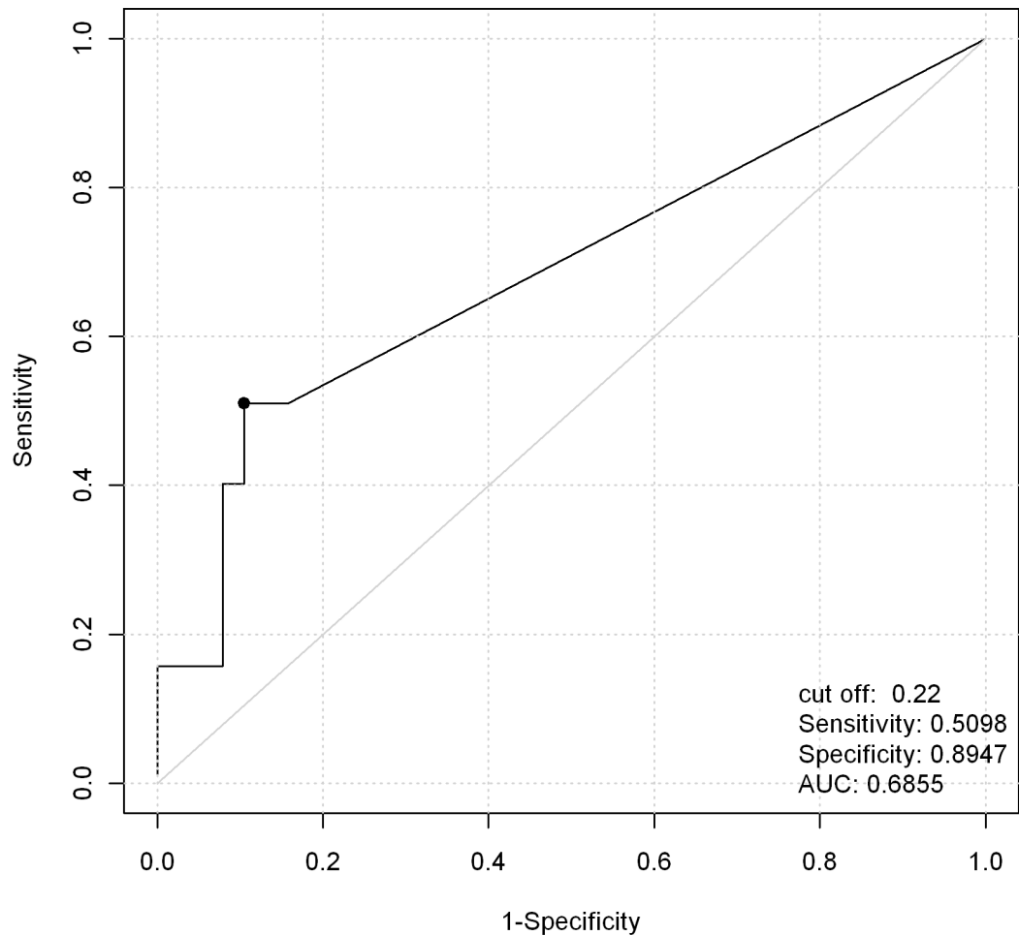

Cut-off that minimizes the distance between the curve and upper left corner.
